# Supplementary material for: Assessing Drug Target Association Using Semantic Linked Data
Source: PLoS Comput Biol. 2012 Jul 5;8(7):e1002574. doi: 10.1371/journal.pcbi.1002574 (PMC3390390; doi:10.1371/journal.pcbi.1002574)
Supplement: Table S4 — Comparing with SEA. (XLSX) [file pcbi.1002574.s010.xlsx]

## Sheet: table1
Tested Drug	CID	gene symbol	target	Ki(nm)	score	p_value	direct
Sedalande	15139	ADRA1A	α1A	1.2	1696	2.35e-05	2
		ADRA1B	α1B	14	1562	2.97e-05	2
		ADRA1D	α1D	7	1595	2.8e-05	2
		HTR1D	5-HT1D	140	624	0.000305	0
Dimetholizine	208842	ADRA1A	α1A	70	NA
		ADRA1B	α1B	240	NA
		ADRA1D	α1D	170	NA
		HTR1A	5-HT1A	110	NA
		DRD2	D2	180	NA
Kalgut	71754	ADRB3	β3	2100	NA
Fabahistin	22529	HTR5A	5-HT5A	130	NA
Prantal	6126	OPRD1	δ-opioid	14000	10	0.22	0
Dimethyltryptamine	6089	HTR1B	5-HT1B	130	1006	9.47e-05	0
		HTR2A	5-HT2A	130	3645	2.58e-06	2
		HTR5A	5-HT5A	2100	512	0.000483	0
		HTR7	5-HT7	210	1056	8.35e-05	0
Doralese	38102	DRD4	D4	18	NA
Prozac	3386	ADRB1	β1	4400	1187	6.22e-05	0
Motilium	3151	ADRA1A	α1A	71	459	0.000618	0
		ADRA1B	α1B	530	277	0.00182	0
		ADRA1D	α1D	710	266	0.00198	0
Paxil	43815	ADRB1	β1	10000	113	0.0098	0
Table 1 and table 2 are taken from the paper (Keiser MJ, Setola V, Irwin JJ, Laggner C, Abbas AI, et al. 2009 Predicting new molecular targets for known drugs. Nature )
direct=2 means the pair is directly linked in SLAP network; direct=0 means the pair is not directly linked.

## Sheet: table2
Tested Drug	CID	gene symbol	target	Ki(nm)	score	p_value	direct
Xenazine	6018	ADRA2A	α2A	960	4.2	0.41	0
		ADRA2C	α2C	1300	0.6	0.8	0
Rescriptor	5625	HRH4	H4	5300	6.8	0.3	0
Vadilex	3689	OPRM1	μ-opioid receptors	1400	no path		0
		SLC6A4	5-HTT	77	no path		0
RO-25-6981	6604887	SLC6A4	5-HTT	1400	18	0.12	0
		DRD4	D4	120	125	0.00823	0
		SLC6A2	NET	1300	18	0.12	0
		OPRK1	κ-opioid receptor	3100	3	0.47	0
