# Supplementary material for: Assessing Drug Target Association Using Semantic Linked Data
Source: PLoS Comput Biol. 2012 Jul 5;8(7):e1002574. doi: 10.1371/journal.pcbi.1002574 (PMC3390390; doi:10.1371/journal.pcbi.1002574)
Supplement: Table S5 — Comparing with CMap. (XLSX) [file pcbi.1002574.s011.xlsx]

## Sheet: Sheet1
query	hits	score	rank
Vorinostat	trichostatin A	0.997	1
	valproic acid	0.85	2
	hc toxin	NA
Trichostatin a	vorinostat	0.997	1
	valproic acid	0.848	2
	hc toxin	NA
Estradiol	fulvestrant	0.877	1
	raloxifene	0.827	2
	alpha-estradiol	0.821	3
	tamoxifen	0.57	7
	genistein	0.453	9
Chlorpromazine	thioridazine	0.928	1
	amitriptyline	0.927	2
	haloperidol	0.885	3
	trifluoperazine	0.781	4
	clozapine	0.78	5
	fluphenazine	0.72	7
	prochlorperazine	0.5	13
Fluphenazine	chlorpromazine	0.728	1
	trifluoperazine	0.674	2
	thioridazine	0.574	5
	prochlorperazine	0.564	6
	haloperidol	0.548	8
	clozapine	0.345	17
Prochlorperazine	trifluoperazine	0.636	5
	thioridazine	0.572	7
	fluphenazine	0.563	8
	clozapine	0.561	9
	haloperidol	0.511	11
	chlorpromazine	0.501	12
Thioridazine	amitriptyline	0.963	1
	haloperidol	0.934	2
	chlorpromazine	0.928	3
	clozapine	0.88	4
	trifluoperazine	0.816	5
	fluphenazine	0.574	10
	prochlorperazine	0.572	11
Trifluoperazine	thioridazine	0.816	1
	amitriptyline	0.798	2
	chlorpromazine	0.781	3
	haloperidol	0.766	4
	fluphenazine	0.674	10
	prochlorperazine	0.636	11
	clozapine	0.624	12
* hc toxin is not found in the network. The similarity is measure by pearson coefficient. 0.75 is set as a threshold.
